# Supplementary material for: Global cropland could be almost halved: Assessment of land saving potentials under different strategies and implications for agricultural markets
Source: PLOS journal article supplement (doi:10.1371/journal.pone.0263063), 2022-02-22
Supplement: S5 (10.1371/journal.pone.0263063.s005) [file journal.pone.0263063.s005]

## S5 Appendix: Coupling approach and socio-economic land saving

### 2 Marginal Profit Functions

For the coupling, DART-BIO provides sub-region and crop-specific marginal profit functions that are derived from the market equilibrium and depend i.a. on the productivity of land in relation to other factor inputs (capital, labor, energy). They determine the achievable profit for allocating a certain crop category on an additional unit of land as a function of the already allocated area to this crop category. The attainable marginal profit [\$/hectare (ha)] is highest for the first cultivated hectare of a crop category and decreases, the more cropland is allocated, until it approaches zero when current cropland area of the crop is reached (Figure A). Within a sub-region, the marginal profit functions can rank the crop categories according to the profitability of allocating an additional unit of its cropland. For details on how marginal profit functions are determined, see Mauser et al. [1].

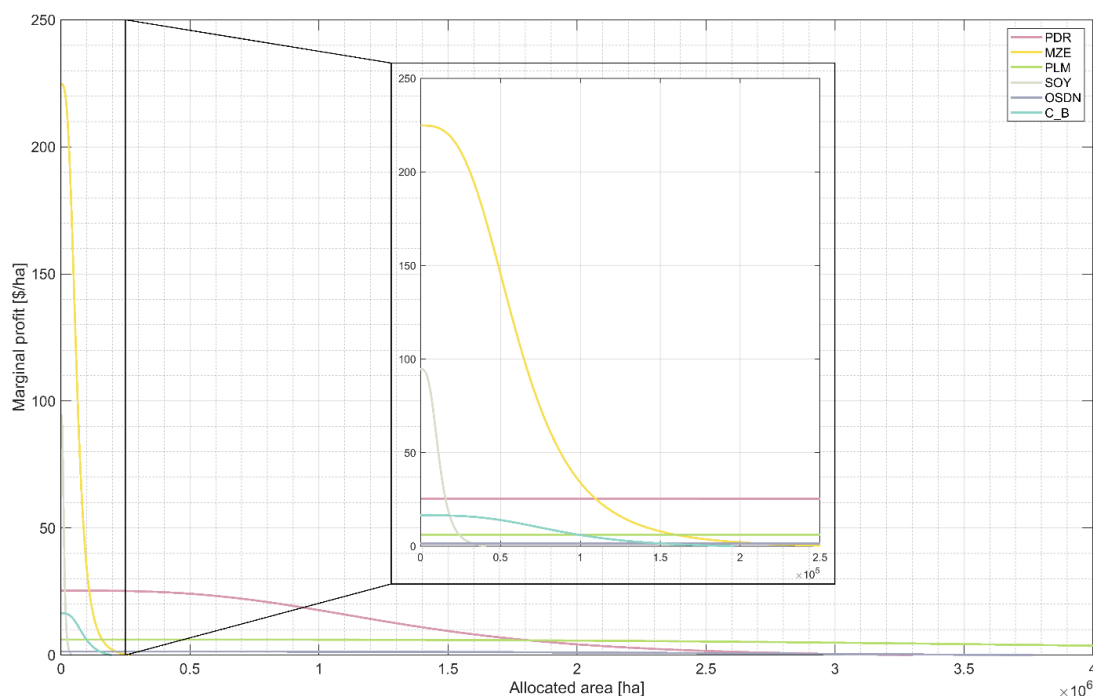

**Figure A. Exemplary marginal profit function for the sub-region in AEZ 6 in Malaysia and Indonesia.** The x-axis displays the allocatable cropland [hectare (ha)] for each crop category within the sub-region, while the y-axis shows the attainable marginal profit [\$/ha] for the allocation of one additional hectare cropland. Marginal profit functions are attainable for all crop categories cultivated within the sub-region.

## 20 **Coupling PROMET and DART-BIO**

Based on the marginal profit functions from DART-BIO and the resulting marginal  
22 profitability per production unit [ $\$/t$ ], we can calculate the potential marginal profit per  
hectare [ $\$/ha$ ] attainable under the potential yields derived from PROMET. It defines  
24 the attainable marginal profit by allocating one unit of cropland of a specific crop  
category. The potential marginal profit per hectare [ $\$/ha$ ] differs between the sample  
26 locations within a sub-region due to spatially differing environmental conditions and  
thus biophysical yield potentials. A maximum achievable total potential profit [ $\$$ ] could  
28 be derived by allocating the crop category with the highest potential marginal profit per  
hectare at each location. However, to account for risk aversion of farmers and the  
30 implementation of crop rotation, all profitable crops at a location are allocated, with  
their cropland ratio reflecting the ratio of the potential marginal profits per hectare. This  
32 results in profit-maximized but diversified cropping patterns at each location. Within  
our coupling algorithm, cropland is then allocated at the most profitable location with  
34 the highest achievable total potential profit [ $\$$ ]. Since the attainable marginal profit per  
hectare changes with the ratio of allocated and total cultivated area of a crop category  
36 (Figure A), also the achievable total potential profit at the remaining locations changes  
after the allocation of cropland at the most profitable location. Thus, the cropland  
38 allocation and the thereupon calculated achievable total profit needs to be recalculated  
for all remaining locations after each allocation at the next most profitable location.  
40 These steps are sequentially repeated until current statistical production is reached for  
all crop categories within the sub-region (for details see Mauser et al. [1]).

42 When current cropping patterns change to more profitable ones, it is possible that less  
profitable crops are reallocated to locations with relatively lower production potential,  
44 resulting in a larger cropland requirement compared to current statistics for those  
crops. However, if the statistical acreage has been reached, the marginal profitability

46 of additional cropland allocation is not yet defined so that the attainable marginal profit  
is zero, and thus the crop is by definition no longer profitable to allocate. To maintain  
48 current crop production, we assume that the crop is nonetheless allocated by a fixed  
area share, determined by the number of crops that can be allocated at each location.  
50 Thus, we allow the expansion of cropland into saved cropland of other crops, if it is  
necessary to maintain current statistical production, and as long as current statistical  
52 cropland over all crops is not expanded. If within a sub-region, profit-maximized  
reallocation and the resulting cropping patterns are not able to meet the current  
54 statistical production targets, we assume that current cropping patterns are maintained  
and land saving is not implementable within this sub-region.

## 56 **Iteration**

As soon as current statistical production is reached, the allocation is stopped, and the  
58 resulting new cropland requirements for each crop category are fed back into DART-  
BIO (Figure B). Even though the total production of each crop category remains  
60 constant, the decreased cropland requirements change the productivity of land as  
primary production factor and thus affect the marginal profitability of crops, leading to  
62 new marginal profit functions. Thus, for the SLS, those changes are again fed back  
and serve as input for the coupling approach with the socio-economic land saving  
64 algorithm, resulting in new profit-optimized cropping patterns and land saving  
potentials. The iteration hence allows to account for the interplay of land use decision  
66 making and resulting cropping patterns and the socio-economic context (demand,  
prices, trade flows). It is carried out until a stable crop-allocation is established in all  
68 sub-regions, which is defined as changes in required cropland and resulting cropland  
productivity between two iteration-steps are below 1% (Figure C). For this evaluation,  
70 we include all crops that are sufficiently relevant within their sub-region, defined by  
their cropland share on total cropland area in the sub-region and their absolute

cropland area that needs to be greater than 1% and 250 hectares, respectively, and for which land is a relevant production factor and thus the proportion of land in factor input is above 5%.

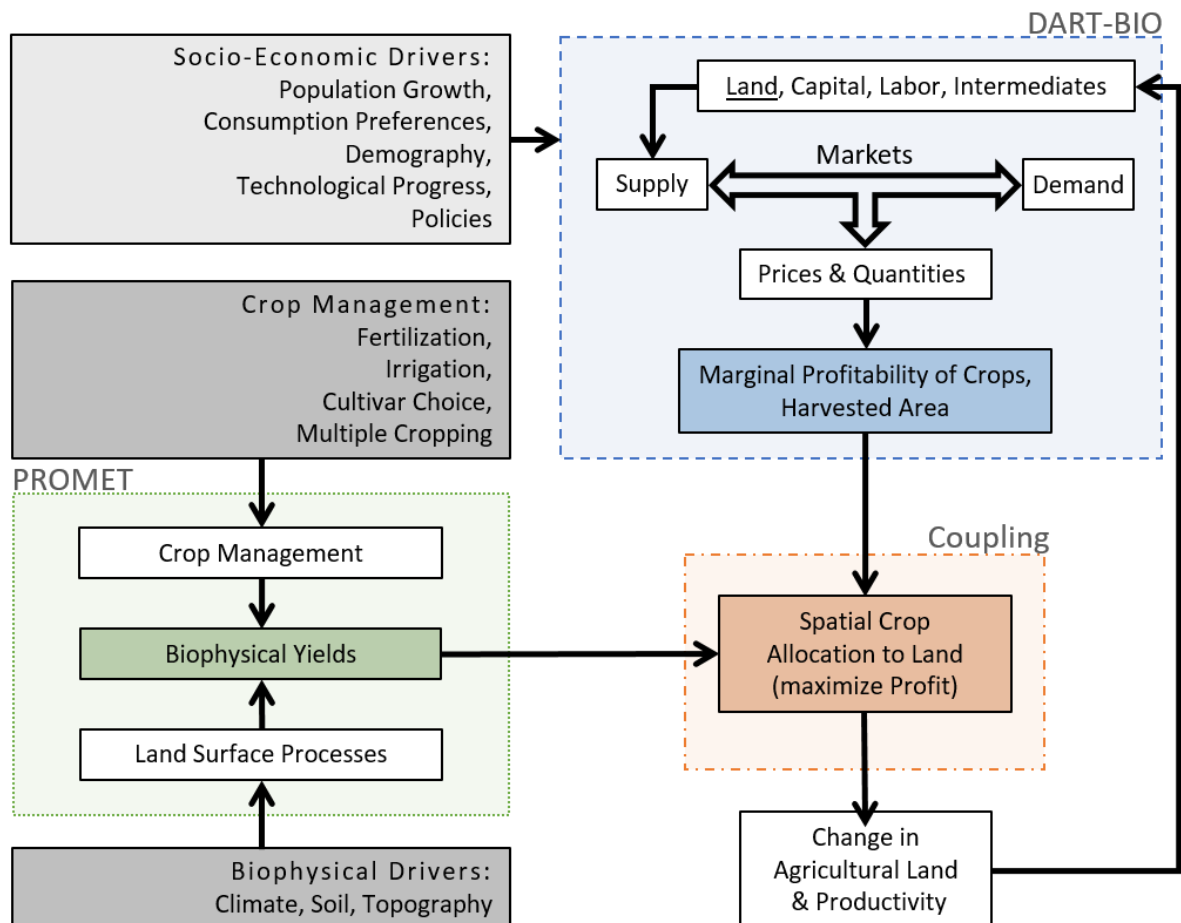

**Figure B. Modified coupling approach of PROMET and DART-BIO to integratively assess the effect of land saving on agricultural markets and the resulting feedbacks on land saving.**

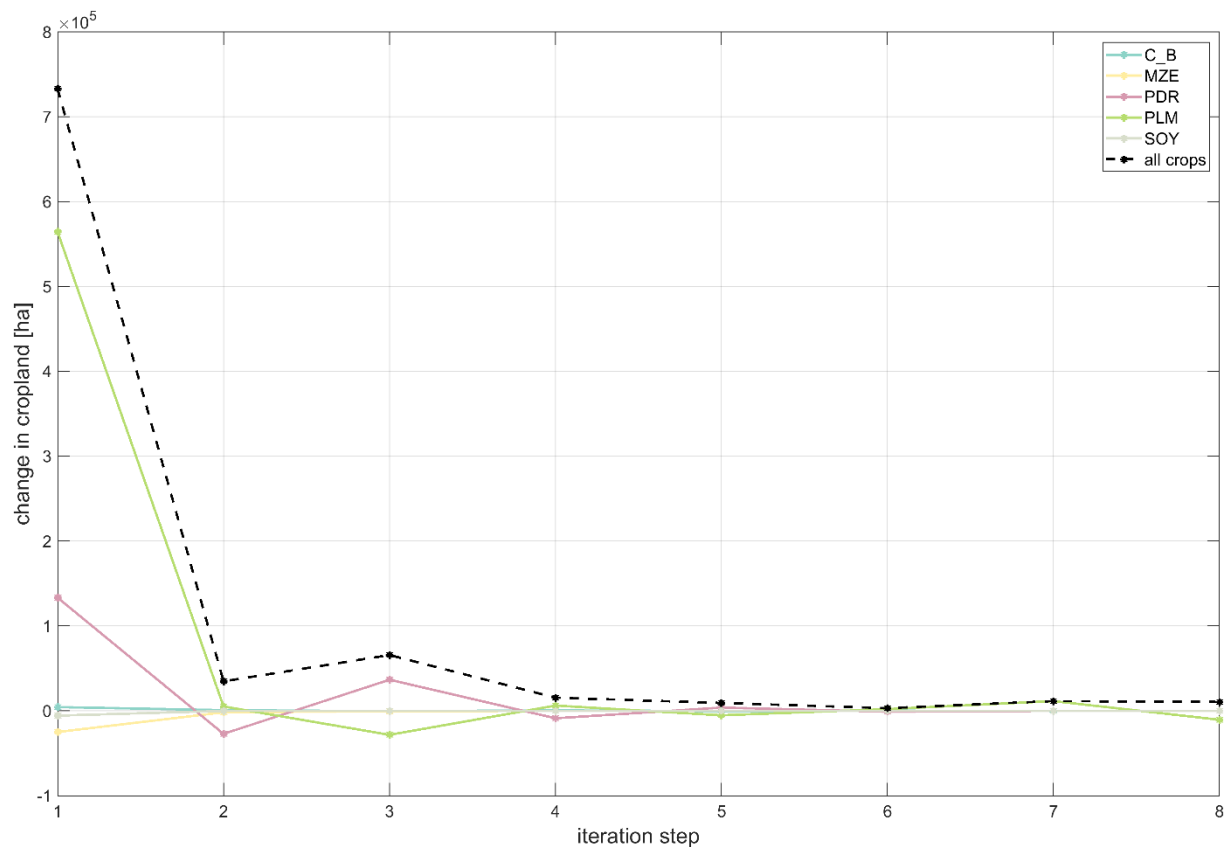

**Figure C. Change in allocated cropland [hectare] per crop category and accumulated over all crops within the exemplary sub-region AEZ 6 in Malaysia and Indonesia.** For each sub-region, a stable cropland allocation can be achieved after a different iteration step. However, iteration is carried out until a stable allocation is reached globally in all sub-regions.

## References

1. Mauser W, Klepper G, Zabel F, Delzeit R, Hank T, Putzenlechner B, et al. Global biomass production potentials exceed expected future demand without the need for cropland expansion. Nat Commun. 2015;6. doi: 10.1038/ncomms9946.
